# Supplementary material for: The relationship between anticyclonic anomalies in northeastern Asia and severe haze in the Beijing–Tianjin–Hebei region
Source: Copernicus journal article supplement (doi:10.5194/acp-19-5941-2019), 2019-05-06
Supplement: Supplementary file 1 [file acp-19-5941-2019-supplement.pdf]

Supplement of Atmos. Chem. Phys., 19, 5941–5957, 2019  
<https://doi.org/10.5194/acp-19-5941-2019-supplement>  
© Author(s) 2019. This work is distributed under  
the Creative Commons Attribution 4.0 License.

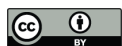

*Supplement of*

## **The relationship between anticyclonic anomalies in northeastern Asia and severe haze in the Beijing–Tianjin–Hebei region**

**Wogu Zhong et al.**

*Correspondence to:* Zhicong Yin (yinzhc@163.com)

The copyright of individual parts of the supplement might differ from the CC BY 4.0 License.

Supplement

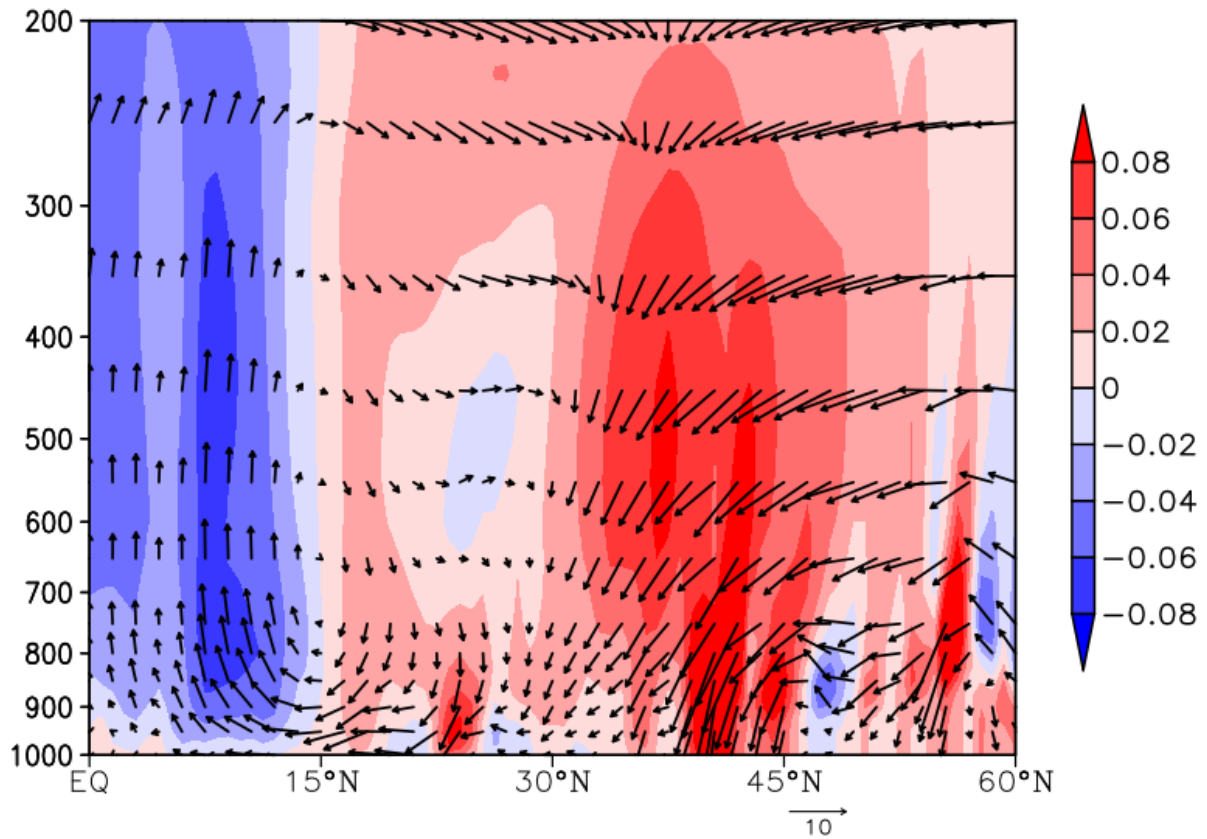

**Figure S1.** The 1979-2010 climatology of the local meridional circulation (114°-120°E mean). Omega, shading, units:  $\text{Pa} \cdot \text{s}^{-1}$ ; wind, arrow, omega magnified 100 times, units:  $\text{m} \cdot \text{s}^{-1}$ . To make the horizontal velocity and the vertical velocity the same order of magnitude, the vertical velocity (omega) has been magnified 100 times.

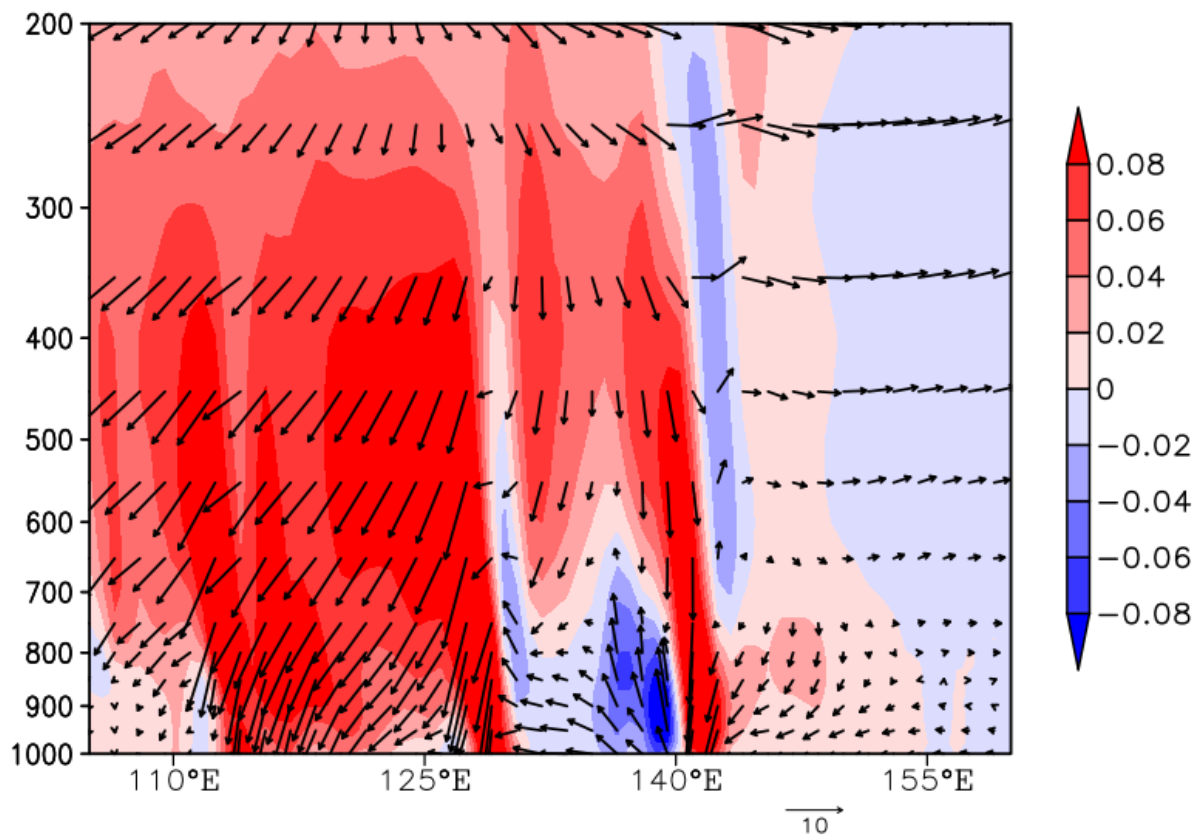

**Figure S2.** The 1979-2010 climatology of the local zonal circulation ( $36^{\circ}$ - $42^{\circ}$ E mean). Omega, shading, units:  $\text{Pa} \cdot \text{s}^{-1}$ ; wind, arrow, omega magnified 100 times, units:  $\text{m} \cdot \text{s}^{-1}$ . To make the horizontal velocity and the vertical velocity the same order of magnitude, the vertical velocity (omega) has been magnified 100 times.
